# Supplementary material for: GBP2 as a potential prognostic biomarker in pancreatic adenocarcinoma
Source: PeerJ. 2021 May 11;9:e11423. doi: 10.7717/peerj.11423 (PMC8121056; doi:10.7717/peerj.11423)
Supplement: Data S1 [file peerj-09-11423-s007.xlsx]

## Sheet: Sheet1
Sample_Number	gender	age	Grade	T_stage	N_stage	M_stage	AJCC_Stage	GBP2(H_score)_tumor	GBP2(H_score)_normal	OS(month)	survival_status(1=dead, 0=alive)
1	Male	52	G1	T3	N0	M0	IIA	185	82	10	1
3	Female	44	G4	T3	N0	M0	IIA	186	62	24	1
4	Female	47	G1	T3	N2	M0	III	192	14	4	1
5	Male	56	G2	T3	N0	M0	IIA	187	120	24	0
6	Female	61	G3	T2	N1	M0	IIB	256	102	9	1
7	Male	58	G1	T3	N0	M0	IIA	185	62	21	1
9	Female	49	G4	T3	N0	M0	IIA	165	42	12	0
10	Male	75	G1	T3	N1	M0	IIB	176	84	13	1
11	Female	55	G2	T4	N0	M0	III	182	82	6	1
12	Male	61	G1	T4	N2	M0	III	188	102	18	1
13	Female	67	G2	T4	N0	M0	III	240	28	7	1
14	Female	52	G1	T4	N1	M0	III	180	39	8	0
17	Male	68	G1	T4	N1	M0	III	190	48	7	1
18	Female	54	G1	T4	N1	M0	III	182	39	12	1
27	Male	51	G1	T1	N0	M0	IA	226	82	48	0
28	Male	50	G1	T3	N0	M0	IIA	184	42	8	1
32	Male	43	G3	T3	N0	M0	IIA	185	62	7	1
35	Male	47	G1	T4	N0	M0	III	182	58	6	1
37	Male	48	G2	T2	N1	M0	IIB	174	64	10	0
2	Female	61	G2	T3	N1	M0	IIB	135	48	29	1
8	Male	46	G2	T3	N1	M0	IIB	120	52	15	1
15	Female	58	G2	T2	N1	M0	IIB	122	38	11	1
16	Male	53	G1	T4	N1	M0	III	80	16	5	0
19	Female	66	G1	T1	N1	M0	IIB	118	76	40	1
20	Male	44	G2	T2	N0	M0	IB	82	82	62	0
21	Female	77	G2	T2	N0	M0	IB	78	18	26	1
22	Male	55	G1	T3	N1	M0	IIB	75	102	24	1
23	Female	34	G1	T4	N1	M0	III	68	82	15	0
24	Female	67	G1	T1	N0	M0	IA	97	54	9	1
25	Female	63	G1	T1	N0	M0	IA	84	62	17	0
26	Male	72	G2	T2	N0	M0	IB	128	53	12	1
29	Male	41	G1	T2	N1	M0	IIB	68	43	42	0
30	Male	55	G1	T1	N1	M0	IIB	64	46	22	0
31	Male	68	G4	T4	N0	M0	III	50	57	18	1
33	Male	77	G1	T4	N1	M0	IIB	122	68	3	0
34	Male	46	G1	T3	N2	M0	III	162	72	5	1
36	Female	41	G2	T4	N0	M0	III	162	61	4	0
38	Male	43	G1	T2	N1	M0	IIB	92	63	7	1
39	Female	43	G3	T1	N0	M0	IA	86	28	52	0
40	Male	51	G1	T1	N0	M0	IA	88	51	27	1
41	Male	61	G1	T1	N1	M0	IIB	102	52	48	1
42	Male	57	G1	T2	N1	M0	IIB	74	36	38	1
